# Supplementary material
Source: publisher figshare collection journal article supplement (https://sage.figshare.com/ndownloader/files/18080258)
Supplement: Supplementary file 1 [file 18080258]

Veterinary Pathology: Supplemental Materials.  
Sakai et al. ErbB2 copy number aberration in canine urothelial carcinoma  
detected by a digital polymerase chain reaction assay.

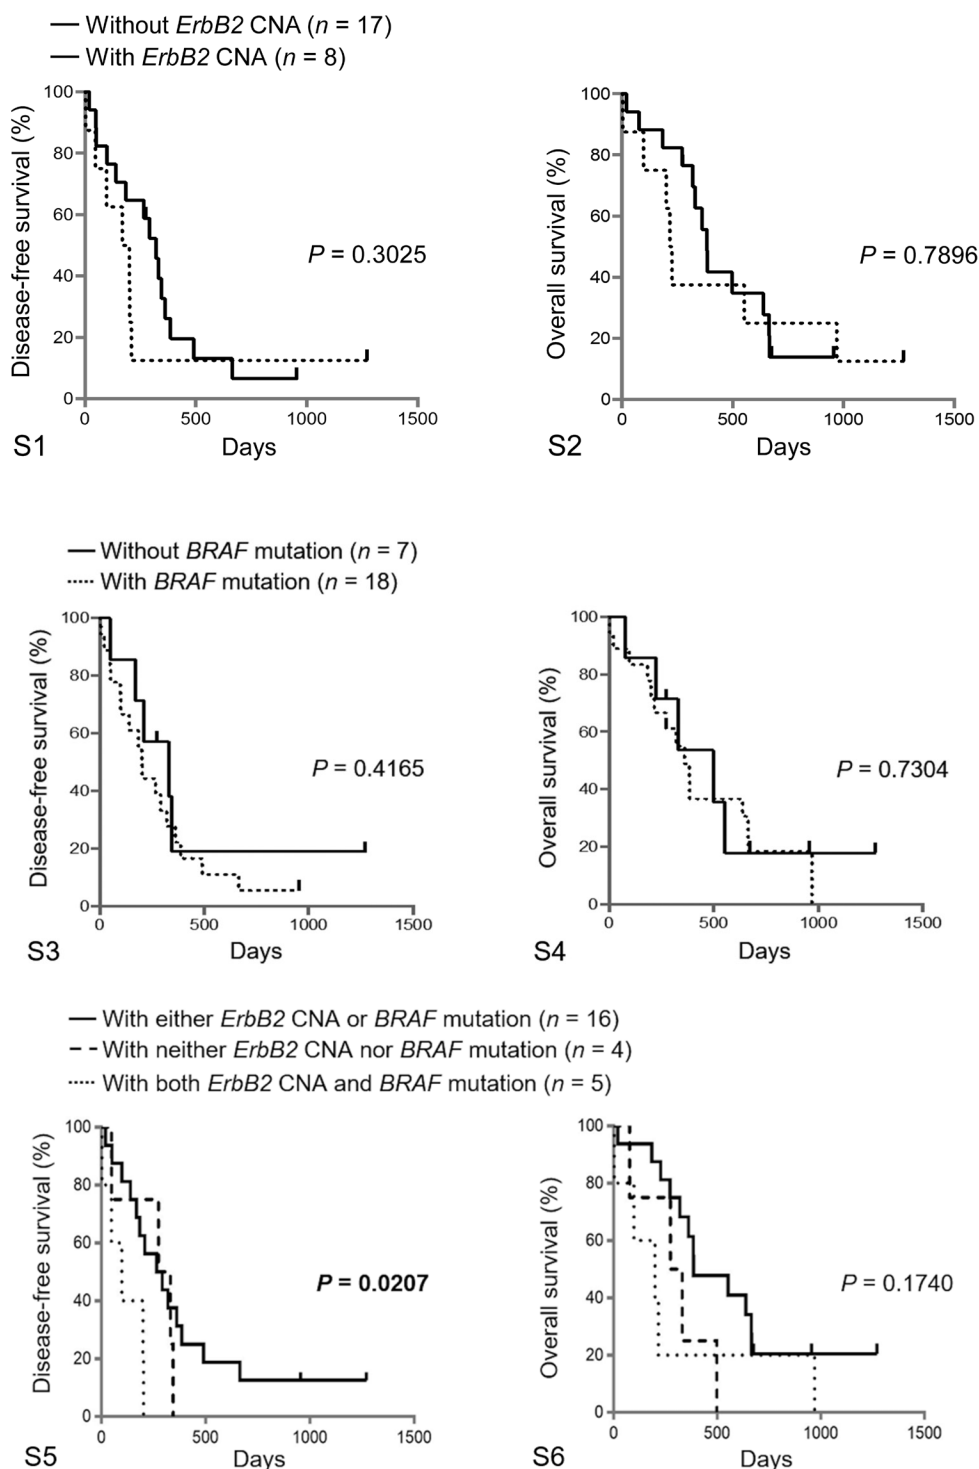

Supplemental Figures S1-S6. Kaplan-Meier curves of disease-free survival and overall survival in dogs with urothelial carcinoma (UC) based on ErbB2 copy number aberration (CNA) (Figs. S1 and S2), BRAF mutation (Figs. S3 and S4), and combination of ErbB2 CNA with BRAF mutation (Figs. S5 and S6). For the survival analyses, 25 UC cases with total cystectomy were used. These cases included 5 cases with both ErbB2 CNA and BRAF mutation, 3 cases with only ErbB2 CNA, 13 cases with only BRAF mutation, and 4 cases with neither ErbB2 CNA nor BRAF mutation. Black symbols indicate censored cases.

# Veterinary Pathology: Supplemental Materials.

## Sakai et al. ErbB2 copy number aberration in canine urothelial carcinoma detected by a digital polymerase chain reaction assay.

**Table S1.** Profiles of the dogs from which formalin-fixed paraffin-embedded urinary bladder tissues were obtained.

| Case  | Age    | Sex    | Neutered status | Breed                       | BRAF mutation | ErbB2: CFA8 ratio | ErbB2 CNA | IHC for ErbB2 | T | N | M | Operative procedure                                                        | Living status | Cause of death       | DFS  | OS      | Therapy before surgery      | Therapy after surgery       |
|-------|--------|--------|-----------------|-----------------------------|---------------|-------------------|-----------|---------------|---|---|---|----------------------------------------------------------------------------|---------------|----------------------|------|---------|-----------------------------|-----------------------------|
| UC 1  | 12y5m  | Female | Spayed          | Miniature Dachshund         | +             | 0.64              | -         | +             | 1 | 1 | 0 | Total cystectomy and subsequent urinary diversion to the prepuce or vagina | Dead          | Renal failure        | 490  | 666     | No treatment                | Piroxicam                   |
| UC 2  | 12y1m  | Male   | Intact          | French Bulldog              | -             | 0.48              | -         | Unknown       | 2 | 0 | 0 | Partial cystectomy                                                         | Dead          | Progression of tumor | 322  | 322     | No treatment                | Piroxicam                   |
| UC 3  | 10y3m  | Female | Spayed          | Shih Tzu                    | -             | 0.73              | -         | Unknown       | 2 | 0 | 0 | Partial cystectomy                                                         | Alive         | -                    | 545  | 545     | Piroxicam                   | Piroxicam                   |
| UC 4  | 10y2m  | Female | Spayed          | Mixed                       | -             | 0.51              | -         | Unknown       | 2 | 0 | 0 | Biopsy only                                                                | Alive         | -                    | -    | 456     | Firocoxib                   | Piroxicam                   |
| UC 5  | 9y4m   | Female | Intact          | Scottish Terrier            | +             | 0.78              | -         | +             | 2 | 0 | 0 | Total cystectomy and subsequent urinary diversion to the prepuce or vagina | Alive         | -                    | 139  | 272     | Piroxicam                   | Piroxicam                   |
| UC 6  | 10y2m  | Female | Spayed          | Papillon                    | +             | 0.47              | -         | +             | 2 | 0 | 0 | Total cystectomy and subsequent urinary diversion to the prepuce or vagina | Dead          | Progression of tumor | 665  | 665     | Firocoxib                   | Piroxicam                   |
| UC 7  | 7y1m   | Female | Intact          | Miniature Dachshund         | +             | 0.93              | -         | +             | 3 | 0 | 0 | Total cystectomy and subsequent urinary diversion to the prepuce or vagina | Dead          | Progression of tumor | 184  | 184     | No treatment                | Cyclophosphamide, Carprofen |
| UC 8  | 10y1m  | Female | Intact          | Border Collie               | -             | 0.60              | -         | Unknown       | 2 | 0 | 0 | Biopsy only                                                                | Dead          | Progression of tumor | -    | 48      | Piroxicam                   | Piroxicam                   |
| UC 9  | 13y6m  | Female | Spayed          | Miniature Dachshund         | +             | 0.91              | -         | +             | 2 | 0 | 0 | Total cystectomy and subsequent urinary diversion to the prepuce or vagina | Dead          | Progression of tumor | 320  | 320     | No treatment                | No treatment                |
| UC 10 | 8y9m   | Female | Intact          | French Bulldog              | +             | 0.95              | -         | +             | 2 | 0 | 0 | Total cystectomy and subsequent urinary diversion to the prepuce or vagina | Dead          | Renal failure        | 20   | 20      | No treatment                | Carprofen                   |
| UC 11 | 13y5m  | Male   | Intact          | Pembroke Welsh Corgi        | -             | 0.67              | -         | +             | 3 | 1 | 0 | Total cystectomy and subsequent urinary diversion to the prepuce or vagina | Dead          | Renal failure        | 274  | 274     | Piroxicam                   | No treatment                |
| UC 12 | 12y2m  | Female | Intact          | Wire Fox Terrier            | -             | 0.72              | -         | -             | 2 | 0 | 0 | Total cystectomy and subsequent urinary diversion to the prepuce or vagina | Dead          | Progression of tumor | 331  | 331     | Piroxicam                   | Chlorambucil, Piroxicam     |
| UC 13 | 12y5m  | Female | Spayed          | Miniature Dachshund         | +             | 0.62              | -         | Unknown       | 2 | 0 | 0 | Total cystectomy and subsequent urinary diversion to the prepuce or vagina | Dead          | Progression of tumor | 265  | 272     | Piroxicam                   | Piroxicam                   |
| UC 14 | 11y4m  | Female | Spayed          | Toy Poodle                  | -             | 0.91              | -         | Unknown       | 2 | 1 | 0 | Biopsy only                                                                | Unknown       | -                    | -    | Unknown | Piroxicam                   | Piroxicam                   |
| UC 15 | 11y0m  | Female | Intact          | Papillon                    | -             | 0.99              | -         | -             | 1 | 0 | 0 | Total cystectomy and subsequent urinary diversion to the prepuce or vagina | Dead          | Progression of tumor | 344  | 498     | Cyclophosphamide, Carprofen | Cyclophosphamide, Carprofen |
| UC 16 | 14y7m  | Female | Castrated       | Papillon                    | +             | 0.96              | -         | +             | 1 | 0 | 0 | Total cystectomy and subsequent urinary diversion to the prepuce or vagina | Dead          | Progression of tumor | 99   | 638     | Piroxicam                   | Piroxicam                   |
| UC 17 | 10y10m | Male   | Intact          | Maltese                     | +             | 0.94              | -         | +             | 1 | 0 | 0 | Total cystectomy and subsequent urinary diversion to the prepuce or vagina | Alive         | -                    | -    | 955     | No treatment                | Piroxicam                   |
| UC 18 | 6y11m  | Female | Spayed          | Pembroke Welsh Corgi        | -             | 0.94              | -         | -             | 3 | 0 | 0 | Total cystectomy and subsequent urinary diversion to the prepuce or vagina | Dead          | Progression of tumor | 49   | 77      | No treatment                | Carprofen                   |
| UC 19 | 11y4m  | Female | Spayed          | Chihuahua                   | +             | 0.88              | -         | -             | 2 | 0 | 0 | Total cystectomy and subsequent urinary diversion to the prepuce or vagina | Dead          | Renal failure        | 361  | 361     | No treatment                | Cyclophosphamide, Carprofen |
| UC 20 | 12y11m | Female | Spayed          | Papillon                    | +             | 0.97              | -         | +             | 2 | 0 | 0 | Total cystectomy and subsequent urinary diversion to the prepuce or vagina | Alive         | -                    | 51   | 675     | No treatment                | Piroxicam                   |
| UC 21 | 12y8m  | Female | Intact          | Miniature Dachshund         | +             | 1.50              | +         | +             | 2 | 1 | 0 | Total cystectomy and subsequent urinary diversion to the prepuce or vagina | Dead          | Renal failure        | 98   | 98      | No treatment                | Meloxicam                   |
| UC 22 | 12y1m  | Male   | Intact          | Yorkshire Terrier           | -             | 1.51              | +         | -             | 1 | 0 | 0 | Total cystectomy and subsequent urinary diversion to the prepuce or vagina | Dead          | Progression of tumor | 209  | 552     | Piroxicam                   | Piroxicam                   |
| UC 23 | 12y0m  | Female | Spayed          | Yorkshire Terrier           | +             | 1.01              | +         | Unknown       | 2 | 0 | 0 | Biopsy only                                                                | Alive         | -                    | -    | 237     | Piroxicam                   | Piroxicam                   |
| UC 24 | 10y11m | Female | Spayed          | Beagle                      | +             | 0.94              | -         | +             | 3 | 0 | 0 | Total cystectomy and subsequent urinary diversion to the prepuce or vagina | Dead          | Progression of tumor | 291  | 384     | No treatment                | Piroxicam                   |
| UC 25 | 11y6m  | Female | Castrated       | Pembroke Welsh Corgi        | -             | 1.46              | +         | -             | 1 | 0 | 0 | Total cystectomy and subsequent urinary diversion to the prepuce or vagina | Alive         | -                    | 1271 | 1271    | Piroxicam                   | Piroxicam                   |
| UC 26 | 11y4m  | Female | Intact          | Shetland Sheepdog           | +             | 1.48              | +         | Unknown       | 2 | 0 | 0 | Total cystectomy and subsequent urinary diversion to the prepuce or vagina | Dead          | Perioperative death  | 3    | 3       | Piroxicam                   | No treatment                |
| UC 27 | 13y1m  | Female | Spayed          | West Highland White terrier | +             | 1.24              | +         | -             | 1 | 0 | 0 | Total cystectomy and subsequent urinary diversion to the prepuce or vagina | Dead          | Progression of tumor | 202  | 970     | Piroxicam                   | Mitoxantrone, Meroxican     |
| UC 28 | 13y3m  | Female | Intact          | Shiba Inu                   | +             | 3.37              | +         | +             | 2 | 0 | 0 | Total cystectomy and subsequent urinary diversion to the prepuce or vagina | Dead          | Progression of tumor | 48   | 216     | Piroxicam                   | Cisplatin, Piroxicam        |
| UC 29 | 11y7m  | Female | Intact          | Miniature Pinscher          | +             | 0.84              | -         | -             | 2 | 0 | 0 | Total cystectomy and subsequent urinary diversion to the prepuce or vagina | Dead          | Renal failure        | 386  | 386     | No treatment                | No treatment                |
| UC 30 | 11y6m  | Female | Intact          | Mixed                       | +             | 1.14              | +         | +             | 2 | 0 | 0 | Total cystectomy and subsequent urinary diversion to the prepuce or vagina | Dead          | Renal failure        | 200  | 200     | Piroxicam                   | Piroxicam                   |
| UC 31 | 13y8m  | Female | Intact          | Maltese                     | +             | 1.03              | +         | Unknown       | 2 | 0 | 0 | Biopsy only                                                                | Alive         | -                    | -    | 603     | Piroxicam                   | Piroxicam                   |
| UC 32 | 13y4m  | Female | Spayed          | Labrador Retriever          | -             | 1.45              | +         | Unknown       | 2 | 0 | 0 | Total cystectomy and subsequent urinary diversion to the prepuce or vagina | Dead          | Progression of tumor | 168  | 226     | No treatment                | Piroxicam                   |
| UC 33 | 13y6m  | Female | Intact          | Shih Tzu                    | -             | 0.82              | -         | Unknown       | 2 | 0 | 0 | Partial cystectomy                                                         | Dead          | Renal failure        | 787  | 787     | Piroxicam                   | Piroxicam                   |
| UC 34 | 8y2m   | Male   | Intact          | French Bulldog              | +             | 1.00              | -         | Unknown       | 2 | 0 | 0 | Partial cystectomy                                                         | Dead          | Renal failure        | 1236 | 1236    | Piroxicam                   | Piroxicam                   |
| UC 35 | 14y2m  | Male   | Intact          | Pembroke Welsh Corgi        | +             | 1.45              | +         | Unknown       | 2 | 1 | 0 | Partial cystectomy                                                         | Dead          | Progression of tumor | 80   | 312     | No treatment                | Piroxicam                   |
| UC 36 | 6y5m   | Female | Spayed          | Mixed                       | -             | 1.22              | +         | Unknown       | 2 | 0 | 0 | Partial cystectomy                                                         | Dead          | Renal failure        | 1139 | 1139    | Piroxicam                   | Piroxicam                   |

Table 1. Continued on the next page.

Veterinary Pathology: Supplemental Materials.  
Sakai et al. ErbB2 copy number aberration in canine urothelial carcinoma  
detected by a digital polymerase chain reaction assay.

**Table S1 (continued).** Profiles of the dogs from which formalin-fixed paraffin-embedded urinary bladder tissues were obtained.

| Case                      | Age    | Sex    | Neutered status | Breed                         | <i>BRAF</i> mutation | <i>ErbB2:CFA8</i> ratio | <i>ErbB2</i> CNA | IHC for <i>ErbB2</i> |
|---------------------------|--------|--------|-----------------|-------------------------------|----------------------|-------------------------|------------------|----------------------|
| Polypoid cystitis 1       | 10y5m  | Male   | Intact          | Toy Poodle                    | -                    | 0.43                    | -                | +                    |
| Polypoid cystitis 2       | 9y11m  | Female | Spayed          | Mixed                         | -                    | 0.48                    | -                | +                    |
| Polypoid cystitis 3       | 10y4m  | Female | Intact          | Mixed                         | -                    | 0.97                    | -                | +                    |
| Polypoid cystitis 4       | 10y3m  | Male   | Castrated       | Beagle                        | -                    | 0.95                    | -                | -                    |
| Polypoid cystitis 5       | 7y1m   | Male   | Intact          | Miniature Pinscher            | -                    | 0.92                    | -                | -                    |
| Polypoid cystitis 6       | 11y4m  | Female | Intact          | Shih Tzu                      | -                    | 0.98                    | -                | -                    |
| Polypoid cystitis 7       | 8y5m   | Male   | Intact          | Cavalier King Charles Spaniel | -                    | 1.02                    | +                | -                    |
| Polypoid cystitis 8       | 10y5m  | Male   | Intact          | Shetland Sheepdog             | -                    | 1.21                    | +                | -                    |
| Normal urinary bladder 1  | 11y0m  | Male   | Intact          | Beagle                        | -                    | 0.65                    | -                | -                    |
| Normal urinary bladder 2  | 11y0m  | Male   | Intact          | Beagle                        | -                    | 0.68                    | -                | -                    |
| Normal urinary bladder 3  | 11y0m  | Male   | Intact          | Beagle                        | -                    | 0.70                    | -                | -                    |
| Normal urinary bladder 4  | 11y0m  | Male   | Intact          | Beagle                        | -                    | 0.70                    | -                | -                    |
| Normal urinary bladder 5  | 10y0m  | Male   | Intact          | Beagle                        | -                    | 0.60                    | -                | -                    |
| Normal urinary bladder 6  | 10y0m  | Male   | Intact          | Beagle                        | -                    | 0.52                    | -                | -                    |
| Normal urinary bladder 7  | 10y0m  | Male   | Intact          | Beagle                        | -                    | 0.57                    | -                | -                    |
| Normal urinary bladder 8  | 10y0m  | Male   | Intact          | Beagle                        | -                    | 0.57                    | -                | -                    |
| Normal urinary bladder 9  | 11y0m  | Male   | Intact          | Beagle                        | -                    | 0.76                    | -                | Unknown              |
| Normal urinary bladder 10 | 10y0m  | Male   | Intact          | Beagle                        | -                    | 0.62                    | -                | Unknown              |
| Normal urinary bladder 11 | 10y0m  | Male   | Intact          | Beagle                        | -                    | 0.80                    | -                | Unknown              |
| Normal urinary bladder 12 | 11y0m  | Male   | Intact          | Beagle                        | -                    | 0.64                    | -                | Unknown              |
| Normal urinary bladder 13 | 11y2m  | Female | Spayed          | Golden retriever              | -                    | 0.62                    | -                | Unknown              |
| Normal urinary bladder 14 | 9y9m   | Male   | Castrated       | Papillon                      | -                    | 0.66                    | -                | Unknown              |
| Normal urinary bladder 15 | 3y0m   | Male   | Intact          | Shetland Sheepdog             | -                    | 0.76                    | -                | Unknown              |
| Normal urinary bladder 16 | 6y1m   | Female | Spayed          | Toy Poodle                    | -                    | 0.65                    | -                | Unknown              |
| Normal urinary bladder 17 | 15y3m  | Female | Spayed          | Mixed                         | -                    | 0.76                    | -                | Unknown              |
| Normal urinary bladder 18 | 12y9m  | Male   | Castrated       | Mixed                         | -                    | 0.63                    | -                | Unknown              |
| Normal urinary bladder 19 | 2y0m   | Male   | Castrated       | Beagle                        | -                    | 0.79                    | -                | Unknown              |
| Normal urinary bladder 20 | 13y10m | Female | Spayed          | Miniature Dachshund           | -                    | 0.54                    | -                | Unknown              |
| Normal urinary bladder 21 | 12y10m | Female | Spayed          | Miniature Dachshund           | -                    | 0.73                    | -                | Unknown              |
| Normal urinary bladder 22 | 9y10m  | Male   | Castrated       | Flat-Coated Retriever         | -                    | 0.78                    | -                | Unknown              |
| Normal urinary bladder 23 | 13y11m | Female | Spayed          | Mixed                         | -                    | 0.89                    | -                | Unknown              |
| Normal urinary bladder 24 | 10y4m  | Male   | Castrated       | Beagle                        | -                    | 0.68                    | -                | Unknown              |
| Normal urinary bladder 25 | 4y0m   | Male   | Castrated       | Pug                           | -                    | 0.65                    | -                | Unknown              |
| Normal urinary bladder 26 | 12y0m  | Female | Intact          | Shih Tzu                      | -                    | 0.67                    | -                | Unknown              |
| Normal urinary bladder 27 | 12y0m  | Female | Spayed          | Pembroke Welsh Corgi          | -                    | 0.74                    | -                | Unknown              |
| Normal urinary bladder 28 | 7y11m  | Female | Spayed          | English springer spaniel      | -                    | 0.78                    | -                | Unknown              |
| Normal urinary bladder 29 | 15y5m  | Male   | Intact          | Pomeranian                    | -                    | 0.86                    | -                | Unknown              |
| Normal urinary bladder 30 | 1y0m   | Male   | Intact          | Toy Poodle                    | -                    | 0.85                    | -                | Unknown              |
| Normal urinary bladder 31 | 7y9m   | Male   | Castrated       | Miniature Schnauzer           | -                    | 0.60                    | -                | Unknown              |
| Normal urinary bladder 32 | 11y0m  | Male   | Castrated       | Cavalier King Charles Spaniel | -                    | 0.83                    | -                | Unknown              |
| Normal urinary bladder 33 | 7y4m   | Female | Intact          | Mixed                         | -                    | 0.75                    | -                | Unknown              |
| Normal urinary bladder 34 | 1y8m   | Female | Spayed          | Pomeranian                    | -                    | 0.61                    | -                | Unknown              |
| Normal urinary bladder 35 | 2y11m  | Female | Intact          | French Bulldog                | -                    | 0.85                    | -                | Unknown              |
| Normal urinary bladder 36 | 3y2m   | Male   | Intact          | French Bulldog                | -                    | 0.78                    | -                | Unknown              |
| Normal urinary bladder 37 | 7y2m   | Female | Spayed          | Pembroke Welsh Corgi          | -                    | 0.86                    | -                | Unknown              |
| Normal urinary bladder 38 | 6y10m  | Male   | Castrated       | Papillon                      | -                    | 0.57                    | -                | Unknown              |
| Normal urinary bladder 39 | 9y8m   | Male   | Castrated       | Cavalier King Charles Spaniel | -                    | 0.60                    | -                | Unknown              |

Abbreviations: *CFA8*, canine chromosome 8; CNA, copy number aberration; DFS, disease-free survival; OS, overall survival; UC, urothelial carcinoma.

# Veterinary Pathology: Supplemental Materials.

## Sakai et al. ErbB2 copy number aberration in canine urothelial carcinoma detected by a digital polymerase chain reaction assay.

**Table S2.** Profiles of the dogs from which urinary sediments were obtained.

| Case               | Age    | Sex    | Neutered  | Breed                         | Diagnosis              | <i>BRAF</i> mutation | <i>ErbB2:CFA8</i> ratio | <i>ErbB2</i> CNA |
|--------------------|--------|--------|-----------|-------------------------------|------------------------|----------------------|-------------------------|------------------|
| UC 1               | 7y7m   | Female | Intact    | Miniature Dachshund           | UC                     | +                    | 0.88                    | -                |
| UC 2               | 8y3m   | Female | Spayed    | Shetland Sheepdog             | UC                     | +                    | 1.13                    | +                |
| UC 3               | 12y9m  | Female | Spayed    | Toy Poodle                    | UC                     | +                    | 0.88                    | -                |
| UC 4               | 12y3m  | Female | Intact    | Papillon                      | UC                     | -                    | 1.27                    | +                |
| UC 5               | 10y11m | Male   | Intact    | Yorkshire Terrier             | UC                     | +                    | 0.78                    | -                |
| UC 6               | 13y1m  | Female | Spayed    | Papillon                      | UC                     | +                    | 1.16                    | +                |
| UC 7               | 11y10m | Female | Spayed    | Miniature Dachshund           | UC                     | +                    | 0.99                    | -                |
| UC 8               | 10y2m  | Female | Intact    | Border Collie                 | UC                     | -                    | 0.84                    | -                |
| UC 9               | 15y6m  | Female | Spayed    | Miniature Dachshund           | UC                     | +                    | 0.98                    | -                |
| UC 10              | 14y2m  | Female | Spayed    | Miniature Dachshund           | UC                     | +                    | 1.12                    | +                |
| UC 11              | 8y9m   | Female | Intact    | French Bulldog                | UC                     | +                    | 0.92                    | -                |
| UC 12              | 13y4m  | Male   | Intact    | Pembroke Welsh Corgi          | UC                     | -                    | 0.96                    | -                |
| UC 13              | 11y2m  | Female | Spayed    | Shiba Inu                     | UC                     | +                    | 0.95                    | -                |
| UC 14              | 14y10m | Male   | Intact    | Miniature Dachshund           | UC                     | +                    | 1.15                    | +                |
| UC 15              | 10y9m  | Female | Spayed    | Pembroke Welsh Corgi          | UC                     | +                    | 0.92                    | -                |
| UC 16              | 10y2m  | Female | Spayed    | Shih Tzu                      | UC                     | -                    | 1.04                    | -                |
| UC 17              | 9y1m   | Male   | Intact    | Chihuahua                     | UC                     | -                    | 0.98                    | -                |
| UC 18              | 11y11m | Female | Spayed    | Mixed                         | UC                     | +                    | 1.32                    | +                |
| UC 19              | 9y1m   | Female | Spayed    | Shetland Sheepdog             | UC                     | +                    | 0.95                    | -                |
| UC 20              | 10y2m  | Female | Spayed    | Mixed                         | UC                     | -                    | 0.83                    | -                |
| UC 21              | 11y7m  | Male   | Castrated | Miniature Dachshund           | UC                     | +                    | 2.29                    | +                |
| UC 22              | 13y6m  | Female | Intact    | Beagle                        | UC                     | +                    | 1.80                    | +                |
| UC 23              | 9y6m   | Female | Intact    | Maltese                       | UC                     | +                    | 4.61                    | +                |
| UC 24              | 16y2m  | Female | Spayed    | Pomeranian                    | UC                     | +                    | 1.16                    | +                |
| UC 25              | 14y5m  | Female | Spayed    | Labrador Retriever            | UC                     | +                    | 1.39                    | +                |
| UC 26              | 12y11m | Female | Spayed    | Shiba Inu                     | UC                     | +                    | 1.88                    | +                |
| UC 27              | 14y4m  | Female | Spayed    | Miniature Dachshund           | UC                     | +                    | 0.95                    | -                |
| UC 28              | 8y8m   | Male   | Castrated | Cavalier King Charles Spaniel | UC                     | +                    | 0.95                    | -                |
| UC 29              | 9y10m  | Male   | Intact    | Pomeranian                    | UC                     | -                    | 0.93                    | -                |
| UC 30              | 14y11m | Male   | Intact    | Toy Poodle                    | UC                     | -                    | 0.89                    | -                |
| UC 31              | 13y8m  | Female | Intact    | Yorkshire Terrier             | UC                     | +                    | 1.01                    | -                |
| UC 32              | 14y2m  | Male   | Intact    | Whippet                       | UC                     | +                    | 1.03                    | -                |
| UC 33              | 10y7m  | Female | Spayed    | English Setter                | UC                     | -                    | 1.27                    | +                |
| UC 34              | 11y6m  | Male   | Castrated | Miniature Pinscher            | UC                     | +                    | 0.71                    | -                |
| UC 35              | 9y9m   | Female | Spayed    | Miniature Dachshund           | UC                     | +                    | 0.99                    | -                |
| UC 36              | 12y9m  | Female | Spayed    | Toy Poodle                    | UC                     | +                    | 1.35                    | +                |
| UC 37              | 12y2m  | Female | Spayed    | Mixed                         | UC                     | +                    | 1.86                    | +                |
| UC 38              | 13y5m  | Male   | Castrated | Chihuahua                     | UC                     | +                    | 0.91                    | -                |
| UC 39              | 13y2m  | Female | Spayed    | Pomeranian                    | UC                     | +                    | 1.03                    | -                |
| UC 40              | 11y0m  | Female | Spayed    | Miniature Dachshund           | UC                     | -                    | 1.03                    | -                |
| UC 41              | 12y7m  | Female | Spayed    | Miniature Dachshund           | UC                     | +                    | 1.08                    | -                |
| UC 42              | 8y2m   | Female | Spayed    | Miniature Schnauzer           | UC                     | -                    | 1.41                    | +                |
| UC 43              | 10y9m  | Female | Spayed    | Pomeranian                    | UC                     | +                    | 0.91                    | -                |
| UC 44              | 13y7m  | Male   | Castrated | Miniature Pinscher            | UC                     | +                    | 1.00                    | -                |
| UC 45              | 12y9m  | Female | Intact    | Miniature Dachshund           | UC                     | -                    | 1.02                    | -                |
| UC 46              | 14y5m  | Female | Spayed    | Pembroke Welsh Corgi          | UC                     | +                    | 0.90                    | -                |
| UC 47              | 11y0m  | Male   | Castrated | Pomeranian                    | UC                     | +                    | 0.92                    | -                |
| UC 48              | 15y10m | Female | Intact    | West Highland White Terrier   | UC                     | -                    | 1.15                    | +                |
| UC 49              | 11y0m  | Female | Spayed    | Miniature Schnauzer           | UC                     | -                    | 0.87                    | -                |
| UC 50              | 12y3m  | Female | Intact    | French Bulldog                | UC                     | +                    | 1.46                    | +                |
| UC 51              | 11y10m | Female | Spayed    | Mixed                         | UC                     | +                    | 1.01                    | -                |
| UC 52              | 10y7m  | Male   | Castrated | Papillon                      | UC                     | -                    | 0.97                    | -                |
| UC 53              | 9y7m   | Female | Spayed    | Miniature Dachshund           | UC                     | -                    | 1.14                    | +                |
| UC 54              | 13y9m  | Male   | Castrated | Miniature Dachshund           | UC                     | +                    | 0.89                    | -                |
| Disease control 1  | 10y10m | Female | Spayed    | Jack Russell Terrier          | Cystitis               | -                    | 1.00                    | -                |
| Disease control 2  | 4y9m   | Female | Spayed    | Miniature Schnauzer           | Cystitis               | -                    | 0.98                    | -                |
| Disease control 5  | 10y7m  | Male   | Castrated | Yorkshire Terrier             | Cystitis               | -                    | 0.90                    | -                |
| Disease control 9  | 16y1m  | Male   | Castrated | Shih Tzu                      | Cystitis               | -                    | 0.77                    | -                |
| Disease control 10 | 10y11m | Male   | Intact    | Miniature Dachshund           | Cystitis               | -                    | 0.90                    | -                |
| Disease control 12 | 14y8m  | Female | Intact    | Miniature Dachshund           | Cystitis               | -                    | 0.90                    | -                |
| Disease control 13 | 12y0m  | Male   | Castrated | Shih Tzu                      | Cystitis               | -                    | 0.96                    | -                |
| Disease control 15 | 11y0m  | Female | Intact    | Norfolk Terrier               | Cystitis               | -                    | 0.84                    | -                |
| Disease control 16 | 7y5m   | Female | Spayed    | Yorkshire Terrier             | Cystitis               | -                    | 0.93                    | -                |
| Disease control 20 | 13y11m | Male   | Intact    | Chihuahua                     | Cystitis               | -                    | 1.00                    | -                |
| Disease control 21 | 5y10m  | Male   | Castrated | Boston Terrier                | Cystitis               | -                    | 0.99                    | -                |
| Disease control 23 | 10y11m | Male   | Intact    | American Cocker Spaniel       | Cystitis               | -                    | 1.01                    | -                |
| Disease control 26 | 16y8m  | Male   | Intact    | Miniature Dachshund           | Cystitis               | -                    | 1.04                    | -                |
| Disease control 28 | 15y2m  | Female | Spayed    | Miniature Dachshund           | Cystitis               | -                    | 1.00                    | -                |
| Disease control 29 | 13y1m  | Female | Spayed    | Miniature Dachshund           | Cystitis               | -                    | 0.98                    | -                |
| Disease control 30 | 12y3m  | Male   | Intact    | Pembroke Welsh Corgi          | Cystitis               | -                    | 0.92                    | -                |
| Disease control 3  | 13y1m  | Female | Spayed    | Yorkshire Terrier             | Polypoid cystitis      | -                    | 0.96                    | -                |
| Disease control 4  | 9y8m   | Female | Spayed    | Mixed                         | Polypoid cystitis      | -                    | 0.77                    | -                |
| Disease control 6  | 10y11m | Female | Spayed    | Cairn Terrier                 | Polypoid cystitis      | -                    | 0.93                    | -                |
| Disease control 8  | 9y5m   | Male   | Castrated | Toy Poodle                    | Polypoid cystitis      | -                    | 0.87                    | -                |
| Disease control 18 | 13y11m | Female | Spayed    | Shih Tzu                      | Polypoid cystitis      | -                    | 1.09                    | -                |
| Disease control 19 | 11y9m  | Female | Spayed    | Mixed                         | Polypoid cystitis      | -                    | 0.79                    | -                |
| Disease control 22 | 13y4m  | Female | Spayed    | Shih Tzu                      | Polypoid cystitis      | -                    | 0.86                    | -                |
| Disease control 24 | 11y9m  | Male   | Intact    | Jack Russell Terrier          | Polypoid cystitis      | -                    | 0.87                    | -                |
| Disease control 25 | 16y4m  | Male   | Castrated | Miniature Dachshund           | Polypoid cystitis      | -                    | 1.01                    | -                |
| Disease control 27 | 10y5m  | Male   | Castrated | Yorkshire Terrier             | Polypoid cystitis      | -                    | 0.97                    | -                |
| Disease control 7  | 2y0m   | Male   | Castrated | Scottish Terrier              | Cystolithiasis         | -                    | 1.08                    | -                |
| Disease control 11 | 2y6m   | Female | Spayed    | Mixed                         | Cystolithiasis         | -                    | 1.10                    | -                |
| Disease control 14 | 9y6m   | Female | Spayed    | Scottish terrier              | Cystolithiasis         | -                    | 0.96                    | -                |
| Disease control 17 | 9y11m  | Male   | Castrated | Chihuahua                     | Cystolithiasis         | -                    | 0.85                    | -                |
| Healthy control 1  | 8y5m   | Male   | Castrated | Labrador Retriever            | Normal urinary bladder | -                    | 0.98                    | -                |
| Healthy control 2  | 11y11m | Male   | Castrated | Beagle                        | Normal urinary bladder | -                    | 0.92                    | -                |
| Healthy control 3  | 8y10m  | Male   | Castrated | Beagle                        | Normal urinary bladder | -                    | 0.99                    | -                |
| Healthy control 4  | 9y4m   | Male   | Intact    | Beagle                        | Normal urinary bladder | -                    | 0.95                    | -                |
| Healthy control 5  | 8y1m   | Male   | Castrated | Beagle                        | Normal urinary bladder | -                    | 0.97                    | -                |
| Healthy control 6  | 9y3m   | Male   | Castrated | Beagle                        | Normal urinary bladder | -                    | 0.99                    | -                |
| Healthy control 7  | 9y9m   | Male   | Castrated | Beagle                        | Normal urinary bladder | -                    | 0.82                    | -                |
| Healthy control 8  | 11y3m  | Male   | Castrated | Beagle                        | Normal urinary bladder | -                    | 0.89                    | -                |
| Healthy control 9  | 7y9m   | Male   | Castrated | Beagle                        | Normal urinary bladder | -                    | 0.89                    | -                |
| Healthy control 10 | 12y0m  | Male   | Castrated | Beagle                        | Normal urinary bladder | -                    | 0.79                    | -                |

Abbreviations: CFA8, canine chromosome 8; CNA, copy number aberration; UC, urothelial carcinoma.

Veterinary Pathology: Supplemental Materials.  
Sakai et al. ErbB2 copy number aberration in canine urothelial carcinoma  
detected by a digital polymerase chain reaction assay.

**Table S3.** Association of *ErbB2* copy number aberration (CNA) with *BRAF* mutation in dogs with urothelial carcinoma.

| Sample                 | <i>BRAF</i> mutation | <i>ErbB2</i> CNA |          | <i>P</i> |
|------------------------|----------------------|------------------|----------|----------|
|                        |                      | Positive         | Negative |          |
| Urinary bladder tissue | Positive             | 8                | 14       | 0.7272   |
|                        | Negative             | 4                | 10       |          |
| Urinary sediment       | Positive             | 14               | 24       | 0.7639   |
|                        | Negative             | 5                | 11       |          |

**Table 4.** Association of *ErbB2* copy number aberration (CNA) and clinical characteristics in dogs with urothelial carcinoma that underwent total cystectomy.

|                            |        | <i>ErbB2</i> CNA         |                           | <i>P</i> |
|----------------------------|--------|--------------------------|---------------------------|----------|
|                            |        | Positive ( <i>n</i> = 8) | Negative ( <i>n</i> = 17) |          |
| Age (months)               | < 140  | 2                        | 10                        | 0.2016   |
|                            | ≥ 140  | 6                        | 7                         |          |
| Sex                        | Male   | 1                        | 3                         | 1.0000   |
|                            | Female | 7                        | 14                        |          |
| Neutered status            | Yes    | 4                        | 8                         | 1.0000   |
|                            | No     | 4                        | 9                         |          |
| Tumor T stage              | T1     | 3                        | 4                         | 0.6396   |
|                            | T2, T3 | 5                        | 13                        |          |
| Lymph node involvement     | N0     | 7                        | 15                        | 1.0000   |
|                            | N+     | 1                        | 2                         |          |
| Distant metastasis         | M0     | 8                        | 17                        | 1.0000   |
|                            | M+     | 0                        | 0                         |          |
| Preoperative NSAIDs        | Yes    | 6                        | 7                         | 0.2016   |
|                            | No     | 2                        | 10                        |          |
| Preoperative chemotherapy  | Yes    | 0                        | 1                         | 1.0000   |
|                            | No     | 8                        | 16                        |          |
| Postoperative NSAIDs       | Yes    | 7                        | 14                        | 1.0000   |
|                            | No     | 1                        | 3                         |          |
| Postoperative chemotherapy | Yes    | 2                        | 4                         | 1.0000   |
|                            | No     | 6                        | 13                        |          |

Abbreviation: NSAIDs, non-steroidal anti-inflammatory drugs.
